# Supplementary material
Source: publisher figshare collection journal article supplement (https://acs.figshare.com/ndownloader/files/5108716)
Supplement: Supplementary file 1 [file 5108716]

data_5
 
_audit_creation_method            SHELXL-97
_chemical_name_systematic
;
2-nitro meta-xylylene benzyl pyridine dimethylglyoximato dicobaloxime
;
_chemical_name_common             'm-xylylene-dicobaloxime'
_chemical_melting_point           ?
_chemical_formula_moiety          'C36 H51 Co2 N11 O11'
_chemical_formula_sum             'C36 H51 Co2 N11 O11'
_chemical_formula_weight          931.74
 
loop_
 _atom_type_symbol
 _atom_type_description
 _atom_type_scat_dispersion_real
 _atom_type_scat_dispersion_imag
 _atom_type_scat_source
 'C'  'C'   0.0033   0.0016
 'International Tables Vol C Tables 4.2.6.8 and 6.1.1.4'
 'H'  'H'   0.0000   0.0000
 'International Tables Vol C Tables 4.2.6.8 and 6.1.1.4'
 'N'  'N'   0.0061   0.0033
 'International Tables Vol C Tables 4.2.6.8 and 6.1.1.4'
 'O'  'O'   0.0106   0.0060
 'International Tables Vol C Tables 4.2.6.8 and 6.1.1.4'
 'Co'  'Co'   0.3494   0.9721
 'International Tables Vol C Tables 4.2.6.8 and 6.1.1.4'
 
_symmetry_cell_setting             triclinic
_symmetry_space_group_name_H-M     'P -1'
_symmetry_space_group_name_Hall    '-P 1'
_symmetry_Int_Tables_number         2
 
loop_
 _symmetry_equiv_pos_as_xyz
 'x, y, z'
 '-x, -y, -z'
 
_cell_length_a                    8.495(7)
_cell_length_b                    15.544(12)
_cell_length_c                    16.264(12)
_cell_angle_alpha                 73.740(10)
_cell_angle_beta                  85.911(2)
_cell_angle_gamma                 77.530(10)
_cell_volume                      2013(3)
_cell_formula_units_Z             2
_cell_measurement_temperature     100(2)
_cell_measurement_reflns_used     900
_cell_measurement_theta_min       -28.0
_cell_measurement_theta_max       +28.0
 
_exptl_crystal_description        prism
_exptl_crystal_colour             orange
_exptl_crystal_size_max           0.26
_exptl_crystal_size_mid           0.23
_exptl_crystal_size_min           0.17
_exptl_crystal_density_meas       ?
_exptl_crystal_density_diffrn     1.537
_exptl_crystal_density_method     'not measured'
_exptl_crystal_F_000              972
_exptl_absorpt_coefficient_mu     0.898
_exptl_absorpt_correction_type    empirical
_exptl_absorpt_correction_T_min   0.8000
_exptl_absorpt_correction_T_max   0.8623
_exptl_absorpt_process_details    'Bruker SADABS'
 
_exptl_special_details
;
 ?
;
 
_diffrn_ambient_temperature       100(2)
_diffrn_radiation_wavelength      0.71073
_diffrn_radiation_type            MoK\a
_diffrn_radiation_source          'fine-focus sealed tube'
_diffrn_radiation_monochromator   graphite
_diffrn_measurement_device_type   'CCD area detector'
_diffrn_measurement_method        \f/\w
_diffrn_detector_area_resol_mean  ?
_diffrn_standards_number          ?
_diffrn_standards_interval_count  ?
_diffrn_standards_interval_time   ?
_diffrn_standards_decay_%         <0.05
_diffrn_reflns_number             13615
_diffrn_reflns_av_R_equivalents   0.0301
_diffrn_reflns_av_sigmaI/netI     0.0713
_diffrn_reflns_limit_h_min        -11
_diffrn_reflns_limit_h_max        11
_diffrn_reflns_limit_k_min        -20
_diffrn_reflns_limit_k_max        11
_diffrn_reflns_limit_l_min        -21
_diffrn_reflns_limit_l_max        18
_diffrn_reflns_theta_min          2.15
_diffrn_reflns_theta_max          28.32
_reflns_number_total              9627
_reflns_number_gt                 7496
_reflns_threshold_expression      >2sigma(I)
 
_computing_data_collection        'SMART 5.628 (BRUKER, 2003)'
_computing_cell_refinement        'SMART 5.628 (BRUKER, 2003)'
_computing_data_reduction         'SAINT+ 6.45 (BRUKER, 2003)'
_computing_structure_solution     'SHELXTL'
_computing_structure_refinement   'SHELXL-97 (Sheldrick, 1997)'
_computing_molecular_graphics     'Diamond 2.1'
_computing_publication_material   'WinGX publication routines (Farrugia, 1999)'
 
_refine_special_details
;
 Refinement of F^2^ against ALL reflections.  The weighted R-factor wR and
 goodness of fit S are based on F^2^, conventional R-factors R are based
 on F, with F set to zero for negative F^2^. The threshold expression of
 F^2^ > 2sigma(F^2^) is used only for calculating R-factors(gt) etc. and is
 not relevant to the choice of reflections for refinement.  R-factors based
 on F^2^ are statistically about twice as large as those based on F, and R-
 factors based on ALL data will be even larger.
;
 
_refine_ls_structure_factor_coef  Fsqd
_refine_ls_matrix_type            full
_refine_ls_weighting_scheme       calc
_refine_ls_weighting_details
 'calc w=1/[\s^2^(Fo^2^)+(0.0761P)^2^+2.9866P] where P=(Fo^2^+2Fc^2^)/3'
_atom_sites_solution_primary      direct
_atom_sites_solution_secondary    difmap
_atom_sites_solution_hydrogens    geom
_refine_ls_hydrogen_treatment     mixed
_refine_ls_extinction_method      none
_refine_ls_extinction_coef        ?
_refine_ls_number_reflns          9627
_refine_ls_number_parameters      550
_refine_ls_number_restraints      0
_refine_ls_R_factor_all           0.0894
_refine_ls_R_factor_gt            0.0685
_refine_ls_wR_factor_ref          0.1705
_refine_ls_wR_factor_gt           0.1584
_refine_ls_goodness_of_fit_ref    1.050
_refine_ls_restrained_S_all       1.050
_refine_ls_shift/su_max           0.002
_refine_ls_shift/su_mean          0.000
 
loop_
 _atom_site_label
 _atom_site_type_symbol
 _atom_site_fract_x
 _atom_site_fract_y
 _atom_site_fract_z
 _atom_site_U_iso_or_equiv
 _atom_site_adp_type
 _atom_site_occupancy
 _atom_site_symmetry_multiplicity
 _atom_site_calc_flag
 _atom_site_refinement_flags
 _atom_site_disorder_assembly
 _atom_site_disorder_group
Co1 Co 0.87039(6) 0.21393(3) 0.17157(3) 0.01355(13) Uani 1 1 d . . .
Co2 Co 0.62862(6) 0.67530(3) 0.30405(3) 0.01357(13) Uani 1 1 d . . .
O1 O 0.8919(3) 0.36770(19) 0.02795(17) 0.0250(6) Uani 1 1 d . . .
H1O H 0.8003 0.3497 0.0344 0.037 Uiso 1 1 d . . .
O2 O 1.0725(3) 0.14069(19) 0.31716(17) 0.0259(6) Uani 1 1 d . . .
O3 O 0.8360(3) 0.06734(19) 0.32013(17) 0.0243(6) Uani 1 1 d . . .
H3O H 0.9265 0.0837 0.3201 0.036 Uiso 1 1 d . . .
O4 O 0.6721(3) 0.28485(19) 0.02487(17) 0.0230(6) Uani 1 1 d . . .
O5 O 0.8688(4) 0.3713(2) 0.3538(2) 0.0351(8) Uani 1 1 d . . .
O6 O 1.0154(3) 0.4490(2) 0.2607(2) 0.0367(8) Uani 1 1 d . . .
O7 O 0.4461(3) 0.79834(19) 0.16227(17) 0.0251(6) Uani 1 1 d . . .
O8 O 0.5801(4) 0.50058(19) 0.40263(18) 0.0259(6) Uani 1 1 d . . .
O9 O 0.8169(4) 0.5488(2) 0.44109(19) 0.0300(7) Uani 1 1 d . . .
H9O H 0.7346 0.5291 0.4250 0.045 Uiso 1 1 d . . .
O10 O 0.6841(3) 0.84673(18) 0.20107(17) 0.0236(6) Uani 1 1 d . . .
H10O H 0.5799 0.8307 0.1918 0.035 Uiso 1 1 d . . .
N1 N 0.9537(4) 0.3140(2) 0.10461(19) 0.0169(6) Uani 1 1 d . . .
N2 N 1.0434(4) 0.2054(2) 0.2422(2) 0.0189(7) Uani 1 1 d . . .
N3 N 0.7799(4) 0.1175(2) 0.2413(2) 0.0180(6) Uani 1 1 d . . .
N4 N 0.6963(4) 0.2241(2) 0.1011(2) 0.0176(6) Uani 1 1 d . . .
N5 N 1.0159(4) 0.1280(2) 0.1089(2) 0.0178(6) Uani 1 1 d . . .
N6 N 0.8880(4) 0.4242(2) 0.2839(2) 0.0248(7) Uani 1 1 d . . .
N7 N 0.4584(4) 0.7188(2) 0.2256(2) 0.0189(7) Uani 1 1 d . . .
N8 N 0.5251(4) 0.5749(2) 0.3397(2) 0.0187(7) Uani 1 1 d . . .
N9 N 0.7994(4) 0.6303(2) 0.3828(2) 0.0204(7) Uani 1 1 d . . .
N10 N 0.7344(4) 0.7748(2) 0.26841(19) 0.0162(6) Uani 1 1 d . . .
N11 N 0.4916(4) 0.7360(2) 0.3888(2) 0.0186(6) Uani 1 1 d . . .
C1 C 1.1573(5) 0.4087(3) 0.0862(3) 0.0362(11) Uani 1 1 d . . .
H1A H 1.2228 0.3929 0.0384 0.054 Uiso 1 1 calc R . .
H1B H 1.2261 0.4210 0.1256 0.054 Uiso 1 1 calc R . .
H1C H 1.0736 0.4633 0.0641 0.054 Uiso 1 1 calc R . .
C2 C 1.0799(5) 0.3307(3) 0.1327(3) 0.0214(8) Uani 1 1 d . . .
C3 C 1.1328(5) 0.2664(3) 0.2152(3) 0.0218(8) Uani 1 1 d . . .
C4 C 1.2704(5) 0.2699(3) 0.2657(3) 0.0313(10) Uani 1 1 d . . .
H4A H 1.2288 0.2885 0.3173 0.047 Uiso 1 1 calc R . .
H4B H 1.3314 0.3143 0.2308 0.047 Uiso 1 1 calc R . .
H4C H 1.3413 0.2092 0.2824 0.047 Uiso 1 1 calc R . .
C5 C 0.5544(5) 0.0355(3) 0.2644(3) 0.0282(9) Uani 1 1 d . . .
H5A H 0.5903 -0.0222 0.2489 0.042 Uiso 1 1 calc R . .
H5B H 0.4398 0.0593 0.2511 0.042 Uiso 1 1 calc R . .
H5C H 0.5703 0.0250 0.3258 0.042 Uiso 1 1 calc R . .
C6 C 0.6505(5) 0.1038(3) 0.2143(3) 0.0206(8) Uani 1 1 d . . .
C7 C 0.6042(5) 0.1651(3) 0.1287(3) 0.0211(8) Uani 1 1 d . . .
C8 C 0.4671(5) 0.1616(3) 0.0781(3) 0.0312(10) Uani 1 1 d . . .
H8A H 0.3745 0.2097 0.0838 0.047 Uiso 1 1 calc R . .
H8B H 0.4375 0.1017 0.0997 0.047 Uiso 1 1 calc R . .
H8C H 0.4993 0.1713 0.0177 0.047 Uiso 1 1 calc R . .
C9 C 1.0879(5) 0.0440(3) 0.1523(3) 0.0264(9) Uani 1 1 d . . .
H9 H 1.0726 0.0255 0.2127 0.032 Uiso 1 1 calc R . .
C10 C 1.1836(5) -0.0171(3) 0.1132(3) 0.0341(11) Uani 1 1 d . . .
H10 H 1.2319 -0.0768 0.1458 0.041 Uiso 1 1 calc R . .
C11 C 1.2080(6) 0.0101(3) 0.0254(3) 0.0381(12) Uani 1 1 d . . .
H11 H 1.2730 -0.0310 -0.0030 0.046 Uiso 1 1 calc R . .
C12 C 1.1372(5) 0.0970(3) -0.0204(3) 0.0328(10) Uani 1 1 d . . .
H12 H 1.1534 0.1174 -0.0805 0.039 Uiso 1 1 calc R . .
C13 C 1.0416(5) 0.1541(3) 0.0237(3) 0.0281(9) Uani 1 1 d . . .
H13 H 0.9921 0.2142 -0.0076 0.034 Uiso 1 1 calc R . .
C14 C 0.7248(4) 0.2922(2) 0.2396(2) 0.0162(7) Uani 1 1 d . . .
H14A H 0.6222 0.2703 0.2514 0.019 Uiso 1 1 calc R . .
H14B H 0.7762 0.2804 0.2955 0.019 Uiso 1 1 calc R . .
C15 C 0.6847(4) 0.3930(3) 0.2015(2) 0.0165(7) Uani 1 1 d . . .
C16 C 0.5662(4) 0.4284(3) 0.1381(2) 0.0197(8) Uani 1 1 d . . .
H16 H 0.5138 0.3875 0.1221 0.024 Uiso 1 1 calc R . .
C17 C 0.5238(5) 0.5204(3) 0.0986(2) 0.0210(8) Uani 1 1 d . . .
H17 H 0.4445 0.5418 0.0551 0.025 Uiso 1 1 calc R . .
C18 C 0.5951(5) 0.5823(3) 0.1213(2) 0.0198(8) Uani 1 1 d . . .
H18 H 0.5650 0.6456 0.0929 0.024 Uiso 1 1 calc R . .
C19 C 0.7118(4) 0.5527(3) 0.1859(2) 0.0172(7) Uani 1 1 d . . .
C20 C 0.7545(4) 0.4576(2) 0.2222(2) 0.0157(7) Uani 1 1 d . . .
C21 C 0.7707(4) 0.6231(3) 0.2144(2) 0.0185(8) Uani 1 1 d . . .
H21A H 0.7812 0.6744 0.1635 0.022 Uiso 1 1 calc R . .
H21B H 0.8798 0.5958 0.2384 0.022 Uiso 1 1 calc R . .
C22 C 0.2117(5) 0.6904(3) 0.1755(3) 0.0320(10) Uani 1 1 d . . .
H22A H 0.2174 0.7458 0.1293 0.048 Uiso 1 1 calc R . .
H22B H 0.1117 0.7006 0.2085 0.048 Uiso 1 1 calc R . .
H22C H 0.2133 0.6394 0.1509 0.048 Uiso 1 1 calc R . .
C23 C 0.3524(5) 0.6679(3) 0.2328(3) 0.0229(8) Uani 1 1 d . . .
C24 C 0.3914(5) 0.5829(3) 0.3020(2) 0.0216(8) Uani 1 1 d . . .
C25 C 0.2933(6) 0.5104(3) 0.3244(3) 0.0365(11) Uani 1 1 d . . .
H25A H 0.3428 0.4610 0.2985 0.055 Uiso 1 1 calc R . .
H25B H 0.1837 0.5367 0.3027 0.055 Uiso 1 1 calc R . .
H25C H 0.2890 0.4858 0.3868 0.055 Uiso 1 1 calc R . .
C26 C 1.0316(6) 0.6633(3) 0.4423(3) 0.0356(11) Uani 1 1 d . . .
H26A H 1.0405 0.6008 0.4794 0.053 Uiso 1 1 calc R . .
H26B H 1.0105 0.7065 0.4776 0.053 Uiso 1 1 calc R . .
H26C H 1.1326 0.6687 0.4101 0.053 Uiso 1 1 calc R . .
C27 C 0.8959(5) 0.6846(3) 0.3812(3) 0.0223(8) Uani 1 1 d . . .
C28 C 0.8582(5) 0.7701(3) 0.3125(3) 0.0206(8) Uani 1 1 d . . .
C29 C 0.9543(5) 0.8437(3) 0.2957(3) 0.0320(10) Uani 1 1 d . . .
H29A H 0.9233 0.8881 0.2405 0.048 Uiso 1 1 calc R . .
H29B H 1.0694 0.8163 0.2943 0.048 Uiso 1 1 calc R . .
H29C H 0.9330 0.8747 0.3413 0.048 Uiso 1 1 calc R . .
C30 C 0.4763(5) 0.6897(3) 0.4712(3) 0.0260(9) Uani 1 1 d . . .
H30 H 0.5277 0.6269 0.4890 0.031 Uiso 1 1 calc R . .
C31 C 0.3903(6) 0.7286(4) 0.5310(3) 0.0414(12) Uani 1 1 d . . .
H31 H 0.3827 0.6934 0.5886 0.050 Uiso 1 1 calc R . .
C32 C 0.3145(6) 0.8204(4) 0.5057(3) 0.0429(13) Uani 1 1 d . . .
H32 H 0.2551 0.8492 0.5459 0.051 Uiso 1 1 calc R . .
C33 C 0.3271(6) 0.8695(3) 0.4206(3) 0.0393(12) Uani 1 1 d . . .
H33 H 0.2762 0.9322 0.4013 0.047 Uiso 1 1 calc R . .
C34 C 0.4162(5) 0.8241(3) 0.3645(3) 0.0268(9) Uani 1 1 d . . .
H34 H 0.4240 0.8571 0.3062 0.032 Uiso 1 1 calc R . .
C35 C 0.7212(11) 0.8861(7) 0.4974(5) 0.085(3) Uani 1 1 d . . .
H35A H 0.6843 0.8288 0.5019 0.102 Uiso 1 1 calc R . .
H35B H 0.6994 0.9267 0.4388 0.102 Uiso 1 1 calc R . .
C36 C 0.8751(16) 0.8681(11) 0.5128(7) 0.174(6) Uani 1 1 d . . .
H36A H 0.9086 0.9244 0.5135 0.261 Uiso 1 1 calc R . .
H36B H 0.9353 0.8434 0.4680 0.261 Uiso 1 1 calc R . .
H36C H 0.8971 0.8230 0.5686 0.261 Uiso 1 1 calc R . .
O11 O 0.644(3) 0.9266(9) 0.5537(7) 0.336(11) Uani 1 1 d . . .
H11O H 0.5524 0.9424 0.5390 0.504 Uiso 1 1 d . . .
 
loop_
 _atom_site_aniso_label
 _atom_site_aniso_U_11
 _atom_site_aniso_U_22
 _atom_site_aniso_U_33
 _atom_site_aniso_U_23
 _atom_site_aniso_U_13
 _atom_site_aniso_U_12
Co1 0.0139(2) 0.0115(2) 0.0158(3) -0.00355(18) 0.00060(17) -0.00413(18)
Co2 0.0155(2) 0.0119(2) 0.0151(2) -0.00420(19) -0.00003(17) -0.00602(18)
O1 0.0246(15) 0.0250(15) 0.0199(14) 0.0045(12) -0.0018(11) -0.0069(12)
O2 0.0309(16) 0.0225(15) 0.0212(14) 0.0011(12) -0.0086(12) -0.0056(12)
O3 0.0293(15) 0.0201(14) 0.0214(14) 0.0002(11) 0.0016(11) -0.0087(12)
O4 0.0236(14) 0.0255(15) 0.0179(14) -0.0025(11) -0.0039(11) -0.0039(12)
O5 0.048(2) 0.0294(17) 0.0278(17) -0.0035(14) -0.0174(14) -0.0073(15)
O6 0.0169(15) 0.0306(17) 0.068(2) -0.0186(17) -0.0108(14) -0.0056(13)
O7 0.0308(16) 0.0207(14) 0.0203(14) -0.0018(11) -0.0046(11) -0.0015(12)
O8 0.0375(17) 0.0181(14) 0.0226(14) -0.0010(12) 0.0025(12) -0.0136(12)
O9 0.0377(17) 0.0216(15) 0.0288(16) 0.0009(13) -0.0118(13) -0.0086(13)
O10 0.0289(15) 0.0172(14) 0.0234(14) -0.0006(11) 0.0014(11) -0.0087(11)
N1 0.0181(16) 0.0163(15) 0.0160(15) -0.0035(12) 0.0029(11) -0.0048(12)
N2 0.0197(16) 0.0146(15) 0.0218(16) -0.0052(13) -0.0006(12) -0.0021(12)
N3 0.0217(16) 0.0146(15) 0.0197(16) -0.0062(13) 0.0027(12) -0.0066(12)
N4 0.0170(15) 0.0161(15) 0.0210(16) -0.0082(13) 0.0003(12) -0.0021(12)
N5 0.0174(15) 0.0150(15) 0.0227(16) -0.0072(13) 0.0010(12) -0.0043(12)
N6 0.0235(18) 0.0172(16) 0.037(2) -0.0133(15) -0.0071(14) -0.0022(13)
N7 0.0187(16) 0.0189(16) 0.0193(16) -0.0072(13) 0.0005(12) -0.0016(13)
N8 0.0258(17) 0.0174(16) 0.0163(16) -0.0069(13) 0.0047(12) -0.0105(13)
N9 0.0254(17) 0.0150(16) 0.0217(17) -0.0051(13) -0.0027(13) -0.0048(13)
N10 0.0221(16) 0.0111(14) 0.0165(15) -0.0053(12) 0.0021(12) -0.0046(12)
N11 0.0214(16) 0.0210(16) 0.0170(16) -0.0064(13) 0.0021(12) -0.0113(13)
C1 0.027(2) 0.032(2) 0.045(3) 0.005(2) -0.0005(19) -0.0177(19)
C2 0.0176(19) 0.0171(18) 0.028(2) -0.0027(16) 0.0042(15) -0.0065(15)
C3 0.0169(18) 0.0198(19) 0.030(2) -0.0090(16) 0.0007(15) -0.0037(15)
C4 0.019(2) 0.033(2) 0.046(3) -0.015(2) -0.0043(18) -0.0062(18)
C5 0.032(2) 0.021(2) 0.036(2) -0.0096(18) 0.0071(18) -0.0143(18)
C6 0.0207(19) 0.0179(19) 0.027(2) -0.0116(16) 0.0091(15) -0.0087(15)
C7 0.0181(19) 0.0211(19) 0.029(2) -0.0142(17) 0.0046(15) -0.0053(15)
C8 0.024(2) 0.038(3) 0.041(3) -0.022(2) -0.0033(18) -0.0119(19)
C9 0.024(2) 0.023(2) 0.033(2) -0.0086(18) 0.0026(17) -0.0073(17)
C10 0.028(2) 0.021(2) 0.053(3) -0.010(2) 0.001(2) -0.0036(18)
C11 0.027(2) 0.040(3) 0.060(3) -0.035(3) 0.011(2) -0.008(2)
C12 0.025(2) 0.046(3) 0.034(2) -0.023(2) 0.0044(18) -0.008(2)
C13 0.022(2) 0.033(2) 0.031(2) -0.0104(19) -0.0001(16) -0.0054(17)
C14 0.0142(17) 0.0174(18) 0.0191(18) -0.0066(14) 0.0025(13) -0.0062(14)
C15 0.0156(17) 0.0184(18) 0.0197(18) -0.0105(15) 0.0028(13) -0.0064(14)
C16 0.0156(18) 0.023(2) 0.027(2) -0.0141(16) -0.0017(14) -0.0059(15)
C17 0.0190(19) 0.025(2) 0.0203(19) -0.0112(16) -0.0017(14) 0.0008(15)
C18 0.025(2) 0.0155(18) 0.0178(18) -0.0064(15) 0.0008(14) -0.0003(15)
C19 0.0166(18) 0.0174(18) 0.0207(19) -0.0104(15) 0.0051(14) -0.0044(14)
C20 0.0160(17) 0.0169(18) 0.0176(18) -0.0085(15) 0.0004(13) -0.0055(14)
C21 0.0203(19) 0.0154(18) 0.0211(19) -0.0071(15) 0.0042(14) -0.0049(14)
C22 0.022(2) 0.049(3) 0.030(2) -0.019(2) -0.0018(17) -0.007(2)
C23 0.0198(19) 0.031(2) 0.024(2) -0.0176(17) 0.0044(15) -0.0064(16)
C24 0.023(2) 0.026(2) 0.022(2) -0.0126(16) 0.0039(15) -0.0106(16)
C25 0.038(3) 0.047(3) 0.039(3) -0.021(2) 0.010(2) -0.032(2)
C26 0.034(3) 0.034(3) 0.043(3) -0.014(2) -0.017(2) -0.005(2)
C27 0.0187(19) 0.0178(19) 0.032(2) -0.0088(17) -0.0044(15) -0.0026(15)
C28 0.0209(19) 0.0168(18) 0.027(2) -0.0093(16) 0.0014(15) -0.0055(15)
C29 0.030(2) 0.026(2) 0.046(3) -0.013(2) 0.0022(19) -0.0150(18)
C30 0.030(2) 0.026(2) 0.024(2) -0.0071(17) 0.0040(16) -0.0096(17)
C31 0.055(3) 0.046(3) 0.028(2) -0.014(2) 0.016(2) -0.021(3)
C32 0.050(3) 0.048(3) 0.040(3) -0.028(2) 0.021(2) -0.018(3)
C33 0.045(3) 0.031(3) 0.047(3) -0.021(2) 0.014(2) -0.009(2)
C34 0.028(2) 0.026(2) 0.030(2) -0.0131(18) 0.0062(17) -0.0100(17)
C35 0.082(6) 0.128(8) 0.052(4) -0.015(5) -0.009(4) -0.045(5)
C36 0.154(12) 0.284(19) 0.107(9) -0.109(11) 0.004(8) -0.022(12)
O11 0.68(3) 0.213(12) 0.178(10) -0.110(9) 0.190(15) -0.204(16)
 
_geom_special_details
;
 All esds (except the esd in the dihedral angle between two l.s. planes)
 are estimated using the full covariance matrix.  The cell esds are taken
 into account individually in the estimation of esds in distances, angles
 and torsion angles; correlations between esds in cell parameters are only
 used when they are defined by crystal symmetry.  An approximate (isotropic)
 treatment of cell esds is used for estimating esds involving l.s. planes.
;
 
loop_
 _geom_bond_atom_site_label_1
 _geom_bond_atom_site_label_2
 _geom_bond_distance
 _geom_bond_site_symmetry_2
 _geom_bond_publ_flag
Co1 N1 1.877(3) . ?
Co1 N3 1.883(3) . ?
Co1 N4 1.888(3) . ?
Co1 N2 1.889(3) . ?
Co1 C14 2.035(4) . yes
Co1 N5 2.054(3) . yes
Co2 N7 1.880(3) . ?
Co2 N8 1.886(3) . ?
Co2 N10 1.887(3) . ?
Co2 N9 1.887(3) . ?
Co2 N11 2.041(3) . yes
Co2 C21 2.057(4) . yes
O1 N1 1.359(4) . ?
O2 N2 1.345(4) . ?
O3 N3 1.358(4) . ?
O4 N4 1.330(4) . ?
O5 N6 1.226(5) . ?
O6 N6 1.226(5) . ?
O7 N7 1.359(4) . ?
O8 N8 1.332(4) . ?
O9 N9 1.339(4) . ?
O10 N10 1.344(4) . ?
N1 C2 1.296(5) . ?
N2 C3 1.303(5) . ?
N3 C6 1.292(5) . ?
N4 C7 1.298(5) . ?
N5 C9 1.334(5) . ?
N5 C13 1.347(5) . ?
N6 C20 1.475(5) . ?
N7 C23 1.301(5) . ?
N8 C24 1.295(5) . ?
N9 C27 1.292(5) . ?
N10 C28 1.292(5) . ?
N11 C34 1.340(5) . ?
N11 C30 1.345(5) . ?
C1 C2 1.495(5) . ?
C2 C3 1.463(6) . ?
C3 C4 1.496(6) . ?
C5 C6 1.500(5) . ?
C6 C7 1.475(6) . ?
C7 C8 1.491(6) . ?
C9 C10 1.379(6) . ?
C10 C11 1.385(7) . ?
C11 C12 1.375(7) . ?
C12 C13 1.386(6) . ?
C14 C15 1.487(5) . ?
C15 C20 1.396(5) . ?
C15 C16 1.403(5) . ?
C16 C17 1.373(6) . ?
C17 C18 1.382(6) . ?
C18 C19 1.406(5) . ?
C19 C20 1.406(5) . ?
C19 C21 1.489(5) . ?
C22 C23 1.488(6) . ?
C23 C24 1.468(6) . ?
C24 C25 1.494(6) . ?
C26 C27 1.498(6) . ?
C27 C28 1.467(6) . ?
C28 C29 1.498(5) . ?
C30 C31 1.371(6) . ?
C31 C32 1.391(7) . ?
C32 C33 1.389(7) . ?
C33 C34 1.391(6) . ?
C35 C36 1.304(13) . ?
C35 O11 1.314(13) . ?
 
loop_
 _geom_angle_atom_site_label_1
 _geom_angle_atom_site_label_2
 _geom_angle_atom_site_label_3
 _geom_angle
 _geom_angle_site_symmetry_1
 _geom_angle_site_symmetry_3
 _geom_angle_publ_flag
N1 Co1 N3 177.16(13) . . ?
N1 Co1 N4 98.36(14) . . ?
N3 Co1 N4 81.49(14) . . ?
N1 Co1 N2 81.22(14) . . ?
N3 Co1 N2 98.89(14) . . ?
N4 Co1 N2 179.19(14) . . ?
N1 Co1 C14 92.32(15) . . ?
N3 Co1 C14 84.85(15) . . ?
N4 Co1 C14 90.49(15) . . ?
N2 Co1 C14 88.83(15) . . ?
N1 Co1 N5 91.00(14) . . ?
N3 Co1 N5 91.83(14) . . ?
N4 Co1 N5 90.21(14) . . ?
N2 Co1 N5 90.49(14) . . ?
C14 Co1 N5 176.47(13) . . yes
N7 Co2 N8 81.51(15) . . ?
N7 Co2 N10 98.94(14) . . ?
N8 Co2 N10 179.36(14) . . ?
N7 Co2 N9 179.36(14) . . ?
N8 Co2 N9 97.92(15) . . ?
N10 Co2 N9 81.63(14) . . ?
N7 Co2 N11 90.20(14) . . ?
N8 Co2 N11 90.28(14) . . ?
N10 Co2 N11 90.18(13) . . ?
N9 Co2 N11 90.10(15) . . ?
N7 Co2 C21 89.26(16) . . ?
N8 Co2 C21 93.64(15) . . ?
N10 Co2 C21 85.91(14) . . ?
N9 Co2 C21 90.48(16) . . ?
N11 Co2 C21 175.91(14) . . yes
C2 N1 O1 118.8(3) . . ?
C2 N1 Co1 117.5(3) . . ?
O1 N1 Co1 123.7(2) . . ?
C3 N2 O2 121.3(3) . . ?
C3 N2 Co1 116.6(3) . . ?
O2 N2 Co1 122.1(2) . . ?
C6 N3 O3 119.1(3) . . ?
C6 N3 Co1 117.1(3) . . ?
O3 N3 Co1 123.6(2) . . ?
C7 N4 O4 120.7(3) . . ?
C7 N4 Co1 116.5(3) . . ?
O4 N4 Co1 122.7(2) . . ?
C9 N5 C13 118.0(3) . . ?
C9 N5 Co1 120.3(3) . . ?
C13 N5 Co1 121.6(3) . . ?
O5 N6 O6 123.4(4) . . ?
O5 N6 C20 119.2(3) . . ?
O6 N6 C20 117.4(3) . . ?
C23 N7 O7 120.4(3) . . ?
C23 N7 Co2 117.0(3) . . ?
O7 N7 Co2 122.6(2) . . ?
C24 N8 O8 120.4(3) . . ?
C24 N8 Co2 116.5(3) . . ?
O8 N8 Co2 123.0(3) . . ?
C27 N9 O9 120.7(3) . . ?
C27 N9 Co2 116.4(3) . . ?
O9 N9 Co2 122.8(2) . . ?
C28 N10 O10 121.7(3) . . ?
C28 N10 Co2 116.3(3) . . ?
O10 N10 Co2 122.1(2) . . ?
C34 N11 C30 117.6(4) . . ?
C34 N11 Co2 121.1(3) . . ?
C30 N11 Co2 121.3(3) . . ?
N1 C2 C3 112.2(3) . . ?
N1 C2 C1 123.0(4) . . ?
C3 C2 C1 124.8(4) . . ?
N2 C3 C2 112.5(3) . . ?
N2 C3 C4 122.4(4) . . ?
C2 C3 C4 125.0(4) . . ?
N3 C6 C7 112.2(3) . . ?
N3 C6 C5 124.6(4) . . ?
C7 C6 C5 123.2(4) . . ?
N4 C7 C6 112.5(3) . . ?
N4 C7 C8 122.7(4) . . ?
C6 C7 C8 124.9(4) . . ?
N5 C9 C10 122.6(4) . . ?
C9 C10 C11 118.8(4) . . ?
C12 C11 C10 119.5(4) . . ?
C11 C12 C13 118.2(4) . . ?
N5 C13 C12 122.8(4) . . ?
C15 C14 Co1 118.3(2) . . yes
C20 C15 C16 115.6(3) . . ?
C20 C15 C14 126.3(3) . . ?
C16 C15 C14 118.2(3) . . ?
C17 C16 C15 122.0(4) . . ?
C16 C17 C18 120.7(4) . . ?
C17 C18 C19 120.9(4) . . ?
C20 C19 C18 116.0(3) . . ?
C20 C19 C21 125.4(3) . . ?
C18 C19 C21 118.4(3) . . ?
C15 C20 C19 124.8(3) . . ?
C15 C20 N6 118.1(3) . . ?
C19 C20 N6 117.0(3) . . ?
C19 C21 Co2 115.7(3) . . ?
N7 C23 C24 112.0(4) . . ?
N7 C23 C22 124.4(4) . . ?
C24 C23 C22 123.5(4) . . ?
N8 C24 C23 112.8(3) . . ?
N8 C24 C25 122.9(4) . . ?
C23 C24 C25 124.2(4) . . ?
N9 C27 C28 112.6(4) . . ?
N9 C27 C26 124.1(4) . . ?
C28 C27 C26 123.4(4) . . ?
N10 C28 C27 112.9(3) . . ?
N10 C28 C29 124.0(4) . . ?
C27 C28 C29 123.1(4) . . ?
N11 C30 C31 123.3(4) . . ?
C30 C31 C32 118.8(4) . . ?
C33 C32 C31 119.0(4) . . ?
C32 C33 C34 118.1(5) . . ?
N11 C34 C33 123.3(4) . . ?
C36 C35 O11 108.6(11) . . ?
 
loop_
 _geom_torsion_atom_site_label_1
 _geom_torsion_atom_site_label_2
 _geom_torsion_atom_site_label_3
 _geom_torsion_atom_site_label_4
 _geom_torsion
 _geom_torsion_site_symmetry_1
 _geom_torsion_site_symmetry_2
 _geom_torsion_site_symmetry_3
 _geom_torsion_site_symmetry_4
 _geom_torsion_publ_flag
N3 Co1 N1 C2 93(3) . . . . ?
N4 Co1 N1 C2 179.9(3) . . . . ?
N2 Co1 N1 C2 0.6(3) . . . . ?
C14 Co1 N1 C2 89.1(3) . . . . ?
N5 Co1 N1 C2 -89.7(3) . . . . ?
N3 Co1 N1 O1 -89(3) . . . . ?
N4 Co1 N1 O1 -2.0(3) . . . . ?
N2 Co1 N1 O1 178.8(3) . . . . ?
C14 Co1 N1 O1 -92.8(3) . . . . ?
N5 Co1 N1 O1 88.4(3) . . . . ?
N1 Co1 N2 C3 -0.1(3) . . . . ?
N3 Co1 N2 C3 -177.2(3) . . . . ?
N4 Co1 N2 C3 -60(10) . . . . ?
C14 Co1 N2 C3 -92.6(3) . . . . ?
N5 Co1 N2 C3 90.8(3) . . . . ?
N1 Co1 N2 O2 179.1(3) . . . . ?
N3 Co1 N2 O2 2.0(3) . . . . ?
N4 Co1 N2 O2 120(10) . . . . ?
C14 Co1 N2 O2 86.6(3) . . . . ?
N5 Co1 N2 O2 -90.0(3) . . . . ?
N1 Co1 N3 C6 86(3) . . . . ?
N4 Co1 N3 C6 -1.6(3) . . . . ?
N2 Co1 N3 C6 177.7(3) . . . . ?
C14 Co1 N3 C6 89.7(3) . . . . ?
N5 Co1 N3 C6 -91.5(3) . . . . ?
N1 Co1 N3 O3 -89(3) . . . . ?
N4 Co1 N3 O3 -176.4(3) . . . . ?
N2 Co1 N3 O3 2.9(3) . . . . ?
C14 Co1 N3 O3 -85.1(3) . . . . ?
N5 Co1 N3 O3 93.7(3) . . . . ?
N1 Co1 N4 C7 -178.5(3) . . . . ?
N3 Co1 N4 C7 -1.3(3) . . . . ?
N2 Co1 N4 C7 -119(10) . . . . ?
C14 Co1 N4 C7 -86.0(3) . . . . ?
N5 Co1 N4 C7 90.5(3) . . . . ?
N1 Co1 N4 O4 5.2(3) . . . . ?
N3 Co1 N4 O4 -177.7(3) . . . . ?
N2 Co1 N4 O4 65(10) . . . . ?
C14 Co1 N4 O4 97.6(3) . . . . ?
N5 Co1 N4 O4 -85.9(3) . . . . ?
N1 Co1 N5 C9 139.6(3) . . . . ?
N3 Co1 N5 C9 -40.5(3) . . . . ?
N4 Co1 N5 C9 -122.0(3) . . . . ?
N2 Co1 N5 C9 58.4(3) . . . . ?
C14 Co1 N5 C9 -21(2) . . . . ?
N1 Co1 N5 C13 -40.4(3) . . . . ?
N3 Co1 N5 C13 139.4(3) . . . . ?
N4 Co1 N5 C13 58.0(3) . . . . ?
N2 Co1 N5 C13 -121.6(3) . . . . ?
C14 Co1 N5 C13 159(2) . . . . ?
N8 Co2 N7 C23 2.9(3) . . . . ?
N10 Co2 N7 C23 -177.6(3) . . . . ?
N9 Co2 N7 C23 30(13) . . . . ?
N11 Co2 N7 C23 -87.3(3) . . . . ?
C21 Co2 N7 C23 96.7(3) . . . . ?
N8 Co2 N7 O7 -175.4(3) . . . . ?
N10 Co2 N7 O7 4.2(3) . . . . ?
N9 Co2 N7 O7 -148(13) . . . . ?
N11 Co2 N7 O7 94.4(3) . . . . ?
C21 Co2 N7 O7 -81.6(3) . . . . ?
N7 Co2 N8 C24 -4.1(3) . . . . ?
N10 Co2 N8 C24 -138(12) . . . . ?
N9 Co2 N8 C24 176.2(3) . . . . ?
N11 Co2 N8 C24 86.0(3) . . . . ?
C21 Co2 N8 C24 -92.8(3) . . . . ?
N7 Co2 N8 O8 178.7(3) . . . . ?
N10 Co2 N8 O8 45(12) . . . . ?
N9 Co2 N8 O8 -1.0(3) . . . . ?
N11 Co2 N8 O8 -91.1(3) . . . . ?
C21 Co2 N8 O8 90.0(3) . . . . ?
N7 Co2 N9 C27 156(13) . . . . ?
N8 Co2 N9 C27 -176.4(3) . . . . ?
N10 Co2 N9 C27 4.1(3) . . . . ?
N11 Co2 N9 C27 -86.1(3) . . . . ?
C21 Co2 N9 C27 89.9(3) . . . . ?
N7 Co2 N9 O9 -27(13) . . . . ?
N8 Co2 N9 O9 0.1(3) . . . . ?
N10 Co2 N9 O9 -179.5(3) . . . . ?
N11 Co2 N9 O9 90.4(3) . . . . ?
C21 Co2 N9 O9 -93.7(3) . . . . ?
N7 Co2 N10 C28 176.9(3) . . . . ?
N8 Co2 N10 C28 -49(12) . . . . ?
N9 Co2 N10 C28 -3.4(3) . . . . ?
N11 Co2 N10 C28 86.7(3) . . . . ?
C21 Co2 N10 C28 -94.5(3) . . . . ?
N7 Co2 N10 O10 -3.0(3) . . . . ?
N8 Co2 N10 O10 131(12) . . . . ?
N9 Co2 N10 O10 176.7(3) . . . . ?
N11 Co2 N10 O10 -93.2(3) . . . . ?
C21 Co2 N10 O10 85.6(3) . . . . ?
N7 Co2 N11 C34 -50.5(3) . . . . ?
N8 Co2 N11 C34 -132.0(3) . . . . ?
N10 Co2 N11 C34 48.5(3) . . . . ?
N9 Co2 N11 C34 130.1(3) . . . . ?
C21 Co2 N11 C34 32(2) . . . . ?
N7 Co2 N11 C30 130.9(3) . . . . ?
N8 Co2 N11 C30 49.4(3) . . . . ?
N10 Co2 N11 C30 -130.1(3) . . . . ?
N9 Co2 N11 C30 -48.5(3) . . . . ?
C21 Co2 N11 C30 -146.8(19) . . . . ?
O1 N1 C2 C3 -179.2(3) . . . . ?
Co1 N1 C2 C3 -1.0(4) . . . . ?
O1 N1 C2 C1 2.4(6) . . . . ?
Co1 N1 C2 C1 -179.4(3) . . . . ?
O2 N2 C3 C2 -179.6(3) . . . . ?
Co1 N2 C3 C2 -0.4(4) . . . . ?
O2 N2 C3 C4 -1.3(6) . . . . ?
Co1 N2 C3 C4 177.9(3) . . . . ?
N1 C2 C3 N2 0.9(5) . . . . ?
C1 C2 C3 N2 179.2(4) . . . . ?
N1 C2 C3 C4 -177.4(4) . . . . ?
C1 C2 C3 C4 0.9(7) . . . . ?
O3 N3 C6 C7 178.8(3) . . . . ?
Co1 N3 C6 C7 3.7(4) . . . . ?
O3 N3 C6 C5 0.3(6) . . . . ?
Co1 N3 C6 C5 -174.8(3) . . . . ?
O4 N4 C7 C6 180.0(3) . . . . ?
Co1 N4 C7 C6 3.5(4) . . . . ?
O4 N4 C7 C8 -0.4(6) . . . . ?
Co1 N4 C7 C8 -176.9(3) . . . . ?
N3 C6 C7 N4 -4.6(5) . . . . ?
C5 C6 C7 N4 173.9(3) . . . . ?
N3 C6 C7 C8 175.8(4) . . . . ?
C5 C6 C7 C8 -5.7(6) . . . . ?
C13 N5 C9 C10 -1.5(6) . . . . ?
Co1 N5 C9 C10 178.4(3) . . . . ?
N5 C9 C10 C11 0.9(7) . . . . ?
C9 C10 C11 C12 0.3(7) . . . . ?
C10 C11 C12 C13 -0.8(7) . . . . ?
C9 N5 C13 C12 1.0(6) . . . . ?
Co1 N5 C13 C12 -179.0(3) . . . . ?
C11 C12 C13 N5 0.2(7) . . . . ?
N1 Co1 C14 C15 20.6(3) . . . . ?
N3 Co1 C14 C15 -159.2(3) . . . . ?
N4 Co1 C14 C15 -77.7(3) . . . . ?
N2 Co1 C14 C15 101.8(3) . . . . ?
N5 Co1 C14 C15 -179(93) . . . . ?
Co1 C14 C15 C20 -101.3(4) . . . . ?
Co1 C14 C15 C16 78.4(4) . . . . ?
C20 C15 C16 C17 0.8(5) . . . . ?
C14 C15 C16 C17 -178.9(3) . . . . ?
C15 C16 C17 C18 -1.2(6) . . . . ?
C16 C17 C18 C19 -0.6(6) . . . . ?
C17 C18 C19 C20 2.5(5) . . . . ?
C17 C18 C19 C21 -173.2(3) . . . . ?
C16 C15 C20 C19 1.4(5) . . . . ?
C14 C15 C20 C19 -178.9(3) . . . . ?
C16 C15 C20 N6 -175.7(3) . . . . ?
C14 C15 C20 N6 4.1(5) . . . . ?
C18 C19 C20 C15 -3.0(5) . . . . ?
C21 C19 C20 C15 172.4(3) . . . . ?
C18 C19 C20 N6 174.0(3) . . . . ?
C21 C19 C20 N6 -10.6(5) . . . . ?
O5 N6 C20 C15 -53.4(5) . . . . ?
O6 N6 C20 C15 124.3(4) . . . . ?
O5 N6 C20 C19 129.3(4) . . . . ?
O6 N6 C20 C19 -53.0(5) . . . . ?
C20 C19 C21 Co2 -92.2(4) . . . . ?
C18 C19 C21 Co2 83.1(4) . . . . ?
N7 Co2 C21 C19 -60.9(3) . . . . ?
N8 Co2 C21 C19 20.5(3) . . . . ?
N10 Co2 C21 C19 -159.9(3) . . . . ?
N9 Co2 C21 C19 118.5(3) . . . . ?
N11 Co2 C21 C19 -143.3(19) . . . . ?
O7 N7 C23 C24 177.0(3) . . . . ?
Co2 N7 C23 C24 -1.3(4) . . . . ?
O7 N7 C23 C22 -0.5(6) . . . . ?
Co2 N7 C23 C22 -178.8(3) . . . . ?
O8 N8 C24 C23 -178.3(3) . . . . ?
Co2 N8 C24 C23 4.4(4) . . . . ?
O8 N8 C24 C25 -1.3(6) . . . . ?
Co2 N8 C24 C25 -178.6(3) . . . . ?
N7 C23 C24 N8 -2.0(5) . . . . ?
C22 C23 C24 N8 175.5(4) . . . . ?
N7 C23 C24 C25 -178.9(4) . . . . ?
C22 C23 C24 C25 -1.5(6) . . . . ?
O9 N9 C27 C28 179.5(3) . . . . ?
Co2 N9 C27 C28 -4.0(4) . . . . ?
O9 N9 C27 C26 -0.5(6) . . . . ?
Co2 N9 C27 C26 176.0(3) . . . . ?
O10 N10 C28 C27 -178.0(3) . . . . ?
Co2 N10 C28 C27 2.1(4) . . . . ?
O10 N10 C28 C29 1.9(6) . . . . ?
Co2 N10 C28 C29 -178.0(3) . . . . ?
N9 C27 C28 N10 1.2(5) . . . . ?
C26 C27 C28 N10 -178.8(4) . . . . ?
N9 C27 C28 C29 -178.7(4) . . . . ?
C26 C27 C28 C29 1.3(6) . . . . ?
C34 N11 C30 C31 -1.1(6) . . . . ?
Co2 N11 C30 C31 177.6(4) . . . . ?
N11 C30 C31 C32 0.1(8) . . . . ?
C30 C31 C32 C33 0.6(8) . . . . ?
C31 C32 C33 C34 -0.3(8) . . . . ?
C30 N11 C34 C33 1.4(6) . . . . ?
Co2 N11 C34 C33 -177.2(3) . . . . ?
C32 C33 C34 N11 -0.8(7) . . . . ?
 
_diffrn_measured_fraction_theta_max    0.958
_diffrn_reflns_theta_full              28.32
_diffrn_measured_fraction_theta_full   0.958
_refine_diff_density_max    1.109
_refine_diff_density_min   -0.750
_refine_diff_density_rms    0.117
# END
